# Supplementary material for: Collateral-Core Ratio as a Novel Predictor of Clinical Outcomes in Acute Ischemic Stroke
Source: Springer Nature journal article supplement (doi:10.1007/s12975-022-01066-9), 2022-07-25
Supplement: MOESM1 [file 12975_2022_1066_MOESM1_ESM.pdf]

## Supplementary Material

### Collateral-core ratio as a novel predictor of clinical outcomes in acute ischemic stroke

Jinhao Lyu, MS<sup>1</sup>; Sa Xiao, PhD<sup>2,3</sup>; Zhihua Meng, MD<sup>4</sup>; Xiaoyan Wu, BS<sup>5</sup>; Wen Chen, MS<sup>6</sup>; Guohua Wang, MD<sup>7</sup>; Qingliang Niu, MD<sup>8</sup>; Xin Li, MS<sup>9</sup>; Yitong Bian, MS<sup>10</sup>; Dan Han, MD, PhD<sup>11</sup>; Weiting Guo, MS<sup>12</sup>; Shuai Yang, MD<sup>13</sup>; Xiangbing Bian, MS<sup>1</sup>; Qi Duan, BS<sup>1</sup>; Yina Lan, MS<sup>1</sup>; Liuxian Wang, MD<sup>1</sup>; Tingyang Zhang, BS<sup>1</sup>; Caohui Duan, PhD<sup>1</sup>; Ling Chen, MD<sup>14</sup>; Chenglin Tian, MD, PhD<sup>15</sup>; Yuesong Pan, PhD<sup>16,17</sup>; Xin Zhou, PhD<sup>2</sup>; Xin Lou, MD, PhD<sup>1\*</sup>, on behalf of the MR-STARS Investigators

#### Affiliation

<sup>1</sup> Department of Radiology, Chinese PLA General Hospital / Chinese PLA Medical School, Beijing, China

<sup>2</sup> Key Laboratory of Magnetic Resonance in Biological Systems, State Key Laboratory of Magnetic Resonance and Atomic and Molecular Physics, National Center for Magnetic Resonance in Wuhan, Wuhan Institute of Physics and Mathematics, Innovation Academy for Precision Measurement Science and Technology, Chinese Academy of Sciences-Wuhan National Laboratory for Optoelectronics, Wuhan, China

<sup>3</sup> University of Chinese Academy of Sciences, Beijing, China

<sup>4</sup> Department of Radiology, Yuebei People's Hospital, Guangdong, China,

<sup>5</sup> Department of Radiology, Anshan Changda Hospital, Liaoning, China

<sup>6</sup> Department of Radiology, Shiyan Taihe Hospital, Hubei, China

<sup>7</sup> Department of Radiology, Qingdao Municipal Hospital Affiliated to Qingdao University, Qingdao, China

<sup>8</sup> Department of Radiology, WeiFang Traditional Chinese Hospital, Shandong, China

<sup>9</sup> Department of Radiology, The Second Hospital of Jilin University, Jilin, China

<sup>10</sup> Department of Radiology, The First Affiliated Hospital of Xi'an Jiaotong University, Shaanxi, China

<sup>11</sup> Department of Radiology, the First Affiliated Hospital of Kunming Medical University, Yunnan, China

<sup>12</sup> Department of Radiology, Shanxi Provincial People's Hospital, Shanxi, China

<sup>13</sup> Department of Radiology, Xiangya Hospital Central South University, Hunan, China

<sup>14</sup> Department of Neurosurgery, Chinese PLA General Hospital, Beijing, China

<sup>15</sup> Department of Neurology, Chinese PLA General Hospital, Beijing, China

<sup>16</sup> China National Clinical Research Center for Neurological Diseases, Beijing Tiantan Hospital, Capital Medical University, Beijing, China

<sup>17</sup> Department of Neurology, Beijing Tiantan Hospital, Capital Medical University, Beijing, China

**\* Corresponding author**

Xin Lou, MD, PhD

Department of Radiology, Chinese PLA General Hospital, 28 Fuxing Road, Beijing 100853, China

Tel: 86-10-66936620

Email: [louxin@301hospital.com.cn](mailto:louxin@301hospital.com.cn)

## **Supplementary Methods**

### **Imaging post-processing and analysis**

Firstly, each T1 image was linearly aligned to the MNI (Montreal Neurological Institute) standard space (1). Secondly, the diffusion-weighted imaging (DWI) and cerebral blood flow (CBF) images of arterial spin labeling (ASL) were aligned to the T1 images in the MNI space. The FLIRT and demons' algorithm was used for alignment (2). Thirdly, images were skull-stripped to remove non-brain regions. All the pre-processing steps were performed by using the free software SPM (Statistical Parametric Mapping) 12 (<http://www.fil.ion.ucl.ac.uk/spm/>).

## Supplementary Figures

### Supplemental Figure S1. Post-processing workflow in the present study

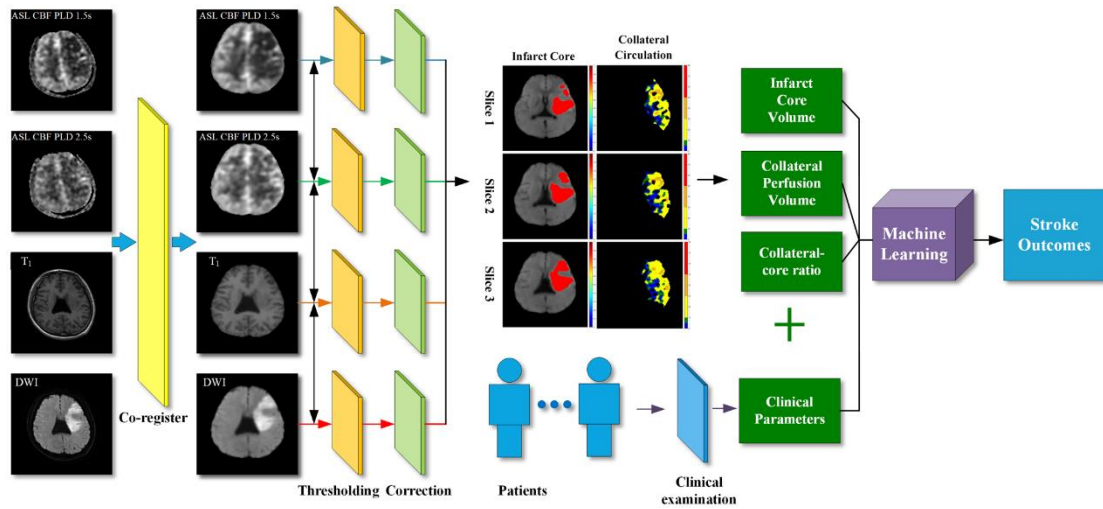

The post-processing workflow was used to measure the ischemic core volume, hypoperfusion volume on ASL, and collateral perfusion volume on multimodal magnetic resonance imaging. Volume segmentations were performed based on adaptive thresholds and regional growth methods. All imaging and clinical parameters were simultaneously analyzed using machine learning. ASL, arterial spin labeling; CBF, cerebral blood flow; PLD, post-labeling delay; DWI, diffusion-weighted imaging.

## Supplementary Figure S2. Receiver operating characteristic (ROC) analysis

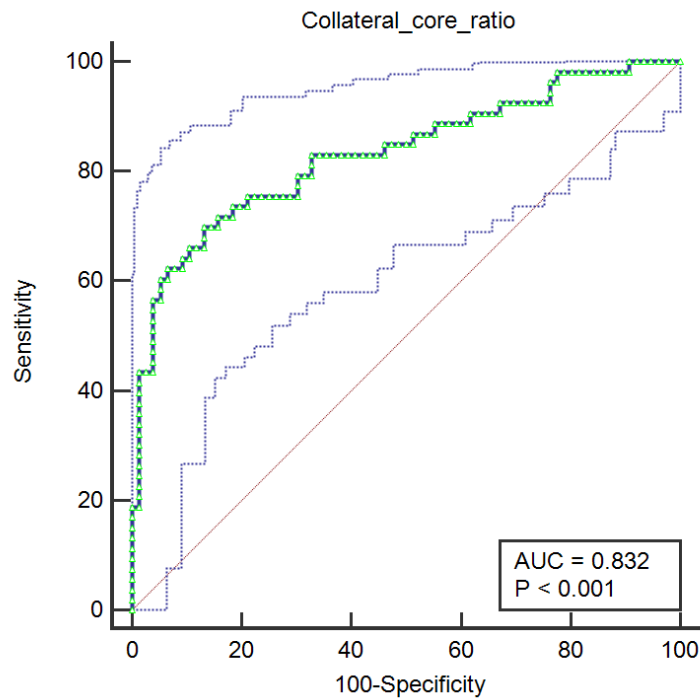

A receiver operating characteristic (ROC) analysis of the collateral-core ratio for identifying patients with an unfavorable outcome. By maximizing Yuden's J, the cutoff value was determined to discriminate between patients with and without unfavorable outcomes, and its sensitivity and specificity were calculated.

**Supplementary Figure S3. Representative case exhibiting a low collateral-core ratio and a poor clinical outcome**

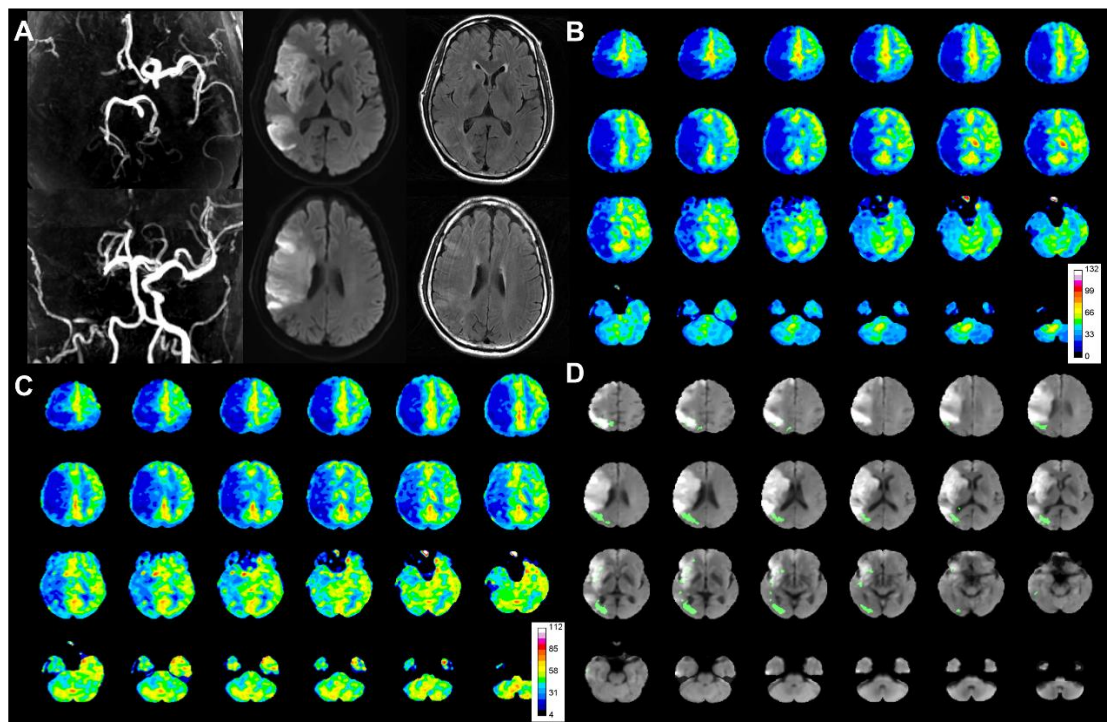

Figure shows a 66-year-old male patient with acute right internal carotid and middle cerebral artery occlusion. Diffusion-weighted imaging (DWI) demonstrates territorial infarction with a volume of 182.74 mL (A). Territorial hypoperfusion can be observed on cerebral blood flow maps on arterial spin labeling with a post-labeling delay (PLD) of 1500ms (B). Delayed inflow in the territory is visible on cerebral blood flow maps from PLD of 1500 ms to 2500 ms (C). The volume of collateral perfusion as overlaid green mask on DWI is 31.72 mL (D). The collateral-core ratio was measured as 0.17. The patient developed an unfavorable functional outcome (3-month mRS score is 4).

**Supplemental references:**

- [1] Holmes, CJ, Hoge, R, Collins, L, et al. Enhancement of MR images using registration for signal averaging. *J. Comput. Assist. Tomogr.* 1998;22:324-333.
- [2] Jenkinson M, Bannister P, Brady M, Smith S. Improved optimization for the robust and accurate linear registration and motion correction of brain images. *NeuroImage.* 2002;17:825-841.
